# Supplementary material for: Seroprevalence and Clinical Features of Scrub Typhus among Febrile Patients Attending a Referral Hospital in Kathmandu, Nepal
Source: MDPI journal article supplement (doi:10.3390/tropicalmed6020078), 2021-05-13
Supplement: s1 [file s1]

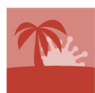

## Supplementary

### Seroprevalence and Clinical Features of Scrub Typhus among Febrile Patients Attending a Referral Hospital in Kathmandu, Nepal

Anil Pokhrel <sup>1</sup>, Binod Rayamajhee <sup>2</sup>, Saroj Khadka <sup>1</sup>, Sandeep Thapa <sup>3</sup>, Samjhana Kapali <sup>1</sup>, Sher Bahadur Pun <sup>4</sup>, Megha Raj Banjara <sup>1</sup>, Prakash Joshi <sup>5</sup>, Binod Lekhak<sup>1</sup> and Komal Raj Rijal <sup>1,\*</sup>

#### Questionnaire

" Seroprevalence and Clinical Features of Scrub Typhus in Febrile Patients Attending Sukraraj Tropical and Infectious Disease Hospital"

#### Questionnaire

Date .....

Name of patient .....

Lab ID .....

Age .....

Gender

Male ☐ Female ☐

Address .....

Patient Type:

OPD ☐ Inpatient ☐

Prior Treatment with Antibiotics:

Yes ☐ No ☐

If Yes, Name of Antibiotics and Duration of Dose .....

Travel History

Yes ☐ No ☐

If Yes, Name of travelled place .....

Symptomatology:

Fever, If present, Days of fever .....

Headache

Eschar

Rash

Sweating



Redness in the Eye  
Breathing Difficulty  
Diarrhoea  
Tinnitus  
Lymphadenopathy  
Hepatomegaly  
Splenomegaly  
Complication, if present, mention.....

**Table S1.** Reference range for biochemical and hematological parameters.

| Test                 | Reference Range *              | Unit       |
|----------------------|--------------------------------|------------|
| TLC                  | 4000-11000                     | cells/cumm |
| Platelet             | 150-400                        | ×1000/cumm |
| Bilirubin Total      | 0.3-0.4                        | mg/dl      |
| Bilirubin Direct     | 0.0-0.4                        | mg%        |
| Alkaline phosphatase | M: 53-128, F: 42-98, C: 54-369 | U/L        |
| SGPT                 | Upto 42                        | U/L        |
| SGOT                 | Upto 37                        | U/L        |
| Creatinine           | 0.4-1.4                        | mg%        |

\*As defined by Sukraraj tropical and infectious disease hospital, TLC: Total Leucocyte Count; cumm: cubicmilimeter; mg: milligram; dl: decilitre; L: Litre; SGPT: Serum Glutamic Pyruvic Transaminase; SGOT: Serum glutamic oxaloacetic transaminase; M: male; F: Female; C: children

**Table S2.** List of travelled places by ST patients.

| Name of Place/District Travelled | Number of Patients (% of total scrub typhus patients) |
|----------------------------------|-------------------------------------------------------|
| Chitwan                          | 4 (2.6)                                               |
| Gulmi                            | 2 (1.3)                                               |
| Sindhupalchock                   | 2 (1.3)                                               |
| Bardiya                          | 1 (0.6)                                               |
| Dhading                          | 1 (0.6)                                               |
| Dhangadi                         | 1 (0.6)                                               |
| Gorkha                           | 1 (0.6)                                               |
| Makawanpur                       | 1 (0.6)                                               |
| Kabhre                           | 1 (0.6)                                               |
| Rautahat                         | 1 (0.6)                                               |
| Sarlahi                          | 1 (0.6)                                               |
| Sindhuli                         | 1 (0.6)                                               |
| Udayapur                         | 1 (0.6)                                               |
| Forest exposure                  | 1 (0.6)                                               |
| Recently returned from India     | 1 (0.6)                                               |

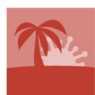

**Table S3:** List of antibiotics used by ST patients prior to hospital visit

| Name of Antibiotics                                        | Number of Patients (%) |
|------------------------------------------------------------|------------------------|
| Against typhoid                                            | 12 (12.6)              |
| Cefixime                                                   | 5 (5.1)                |
| Against UTI                                                | 2 (2.1)                |
| Azithromycin                                               | 2 (2.1)                |
| Ceftriaxone                                                | 1 (1.1)                |
| Cefpodoxime                                                | 1 (1.1)                |
| Cloxacillin                                                | 1 (1.1)                |
| Meprazole                                                  | 1 (1.1)                |
| Norfloxacin                                                | 1 (1.1)                |
| Montaz (Ceftriaxone + Tazobactam)                          | 1 (1.1)                |
| Used but unable to identify neither antibiotic nor disease | 68 (71.5)              |

UTI: Urinary tract infection
